# Supplementary material for: The Impact of Continuous Glucose Monitoring on Markers of Quality of Life in Adults With Type 1 Diabetes: Further Findings From the DIAMOND Randomized Clinical Trial
Source: Oxford University Press journal article supplement (doi:10.2337/dc17-0133), 2017-04-07
Supplement: dc170133supplementarydata.pdf [file dc170133supplementarydata.pdf]

## SUPPLEMENTARY DATA

### Supplementary Appendix 1.

The participating DIAMOND clinical sites were as follows (note that personnel are listed as (I) for Study Investigator and (C) for Study Coordinator): **Joslin Diabetes Center, Boston, MA:** Elena Toschi (I), Howard Wolpert (I), Astrid Atakov-Castillo (C), Edvina Markovic (C); **Research Institute of Dallas, Dallas, TX:** Stephen Aronoff (I), Satanya Brooks (C), Gloria Martinez (C), Angela Mendez (C), Theresa Dunnam (C); **Iowa Diabetes & Endocrinology Research Center, Des Moines, IA:** Anuj Bhargava (I), Kathy Fitzgerald (I), Diana Wright (I), Teck Khoo (I), Pierre Theuma (I), Tara Herrold (C), Debra Thomsen (C); **Park Nicollet Institute - International Diabetes Center, St. Louis Park, MN:** Richard Bergenstal (I), Kathleen McCann (C), Arlene Monk (C), Char Ashanti (C); **Rocky Mountain Diabetes and Osteoporosis Center, Idaho Falls, ID:** David Liljenquist (I), Heather Judge (C), Jean Halford (C); **Henry Ford Medical Center Division of Endocrinology, Detroit, MI:** Davida Kruger (I), Shiri Levy (I), Arti Bhan (I), Terra Cushman (C), Lameka Dawson (C), Heather Remtema (C); **Washington University in St. Louis, St. Louis, MO:** Janet McGill (I), Olivia Jordan (C), Carol Recklein (C); **Portland Diabetes & Endocrinology Center, Portland, OR:** Fawn Wolf (I), James Neifing (I), Jennifer Murdoch (I), Susan Staat (C), Tamara Mayfield (C); **Diabetes & Glandular Disease Clinic, San Antonio, TX:** Mark Kipnes (I), Stacie Haller (C), Terri Ryan (C); **Atlanta Diabetes Associates, Atlanta, GA:** Bruce Bode (I), Jennifer Boyd (I), Nitin Rastogi (C), Katherine Lindmark (C); **Oregon Health & Science University, Portland, OR:** Andrew Ahmann (I), Bethany Klopfenstein (I), Farahnaz Joarder (I), Kathy Hanavan (I), Jessica Castle (I), Diana Aby-Daniel (I), Victoria Morimoto (I), Donald DeFrang (C), Bethany Wollam (C); **Amarillo Medical Specialists LLP, Amarillo, TX:** William Biggs (I), Lorena Sandoval (C), Robin Eifert (C), Becky Cota (C); **Accent Clinical Trials, Las Vegas, NV:** Quang Nguyen (I); **Alejandra Martinez (C); Cathy Duran (C); Columbus Regional Research Institute, Columbus, GA:** Steven Leichter (I); **Emily Evans (C); East Coast Institute for Research, LLC, Jacksonville, FL:** Scott Segel (I), David Sutton (I), Miguel Roura (I), Rebecca Rosenwasser (C), Jennifer McElveen (C), Emily Knisely (C), Anne Johnson (C); **Mountain Diabetes and Endocrine Center, Asheville, NC:** Wendy Lane (I), Stephen Weinrib (I), Kaitlin Ramsey (C), Lynley Farmer (C), Jaimi Custode (C), Mindy Buford (C), Lindsay Hyder (C); **Diabetes & Endocrine Associates PC, Omaha, NE:** Sarah Konigsberg (I), Jennifer Rahman (C); **Physicians Research Associates, LLC, Lawrenceville, GA:** A. Ola Odugbesan (I), Karla Wardell (C), Carolyn Paulus (C); **Consano Clinical Research, San Antonio, TX:** Michelle Welch (I), Daniel Katselnik (I), Greg Danet (C); **Marin Endocrine Care & Research Inc., Greenbrae, CA:** Linda Gaudiani (I), Natalie Woods (C), Jesse Cardozo (C); **Coastal Metabolic Research Centre, Ventura, CA:** Ronald Chochinov (I), Graciela Hernandez (I), Gabriel Garcia (C), Jessica Rios-Santiago (C); **Laureate Medical Group at Northside, LLC, Atlanta, GA:** Kate Wheeler (I), Jennifer Kane (C), Terri Eubanks (C); **Granger Medical Clinic, West Valley, UT:** Michelle Litchman (I), Kim Martin (C), Heather Holtman (C), Carrie Briscoe (C); **Advanced Research Institute, Ogden, UT:** Jack Wahlen (I), Jon Winkfield (I), Hilary Wahlen (C), Emily Hepworth (C), David Winkfield (C), Sue Owens (C). Coordinating Center for the DIAMOND trial was the **Jaeb Center for Health Research, Tampa, FL;** key staff included Katrina Ruedy; Roy W. Beck; Craig Kollman; Tonya Riddlesworth and Thomas Mouse.
